# Supplementary material
Source: PubMed Central journal article supplement (PMC4372803)
Supplement: NIHMS665960-supplement-Supp.pdf [file NIHMS665960-supplement-Supp.pdf]

| Oligo name    | Sequence (5' to 3')                  | Comments                    |
|---------------|--------------------------------------|-----------------------------|
| rampage_TS_01 | TAGTCGAACTGAAGGTCTCCAGCAAGGTAAGrGrG  | TS oligo, 6-base barcode 01 |
| rampage_TS_02 | TAGTCGAACTGAAGGTCTCCAGCACACTACrGrGrG | TS oligo, 6-base barcode 02 |
| rampage_TS_03 | TAGTCGAACTGAAGGTCTCCAGCATTGGTCrGrGrG | TS oligo, 6-base barcode 03 |
| rampage_TS_04 | TAGTCGAACTGAAGGTCTCCAGCAGTGCArGrGrG  | TS oligo, 6-base barcode 04 |
| rampage_TS_05 | TAGTCGAACTGAAGGTCTCCAGCAGCCGAArGrGrG | TS oligo, 6-base barcode 05 |
| rampage_TS_06 | TAGTCGAACTGAAGGTCTCCAGCATGATCArGrGrG | TS oligo, 6-base barcode 06 |
| rampage_TS_07 | TAGTCGAACTGAAGGTCTCCAGCACTGTATrGrGrG | TS oligo, 6-base barcode 07 |
| rampage_TS_08 | TAGTCGAACTGAAGGTCTCCAGCACACTGrGrGrG  | TS oligo, 6-base barcode 08 |
| rampage_TS_09 | TAGTCGAACTGAAGGTCTCCAGCATTCCAGrGrGrG | TS oligo, 6-base barcode 09 |
| rampage_TS_10 | TAGTCGAACTGAAGGTCTCCAGCAACTCTTrGrGrG | TS oligo, 6-base barcode 10 |
| rampage_TS_11 | TAGTCGAACTGAAGGTCTCCAGCAGGATCArGrGrG | TS oligo, 6-base barcode 11 |
| rampage_TS_12 | TAGTCGAACTGAAGGTCTCCAGCATTAAACrGrGrG | TS oligo, 6-base barcode 12 |
| rampage_TS_13 | TAGTCGAACTGAAGGTCTCCAGCAGAGTGCrGrGrG | TS oligo, 6-base barcode 13 |
| rampage_TS_14 | TAGTCGAACTGAAGGTCTCCAGCAAAGGACrGrGrG | TS oligo, 6-base barcode 14 |
| rampage_TS_15 | TAGTCGAACTGAAGGTCTCCAGCACGCTTrGrGrG  | TS oligo, 6-base barcode 15 |
| rampage_TS_16 | TAGTCGAACTGAAGGTCTCCAGCAATGCGTrGrGrG | TS oligo, 6-base barcode 16 |
| rampage_TS_17 | TAGTCGAACTGAAGGTCTCCAGCAATAAGCrGrGrG | TS oligo, 6-base barcode 17 |
| rampage_TS_18 | TAGTCGAACTGAAGGTCTCCAGCAATCTCCrGrGrG | TS oligo, 6-base barcode 18 |
| rampage_TS_19 | TAGTCGAACTGAAGGTCTCCAGCATAACTCrGrGrG | TS oligo, 6-base barcode 19 |
| rampage_TS_20 | TAGTCGAACTGAAGGTCTCCAGCAATAGArGrGrG  | TS oligo, 6-base barcode 20 |
| rampage_TS_21 | TAGTCGAACTGAAGGTCTCCAGCAAGCCTArGrGrG | TS oligo, 6-base barcode 21 |
| rampage_TS_22 | TAGTCGAACTGAAGGTCTCCAGCATGTAGTrGrGrG | TS oligo, 6-base barcode 22 |
| rampage_TS_23 | TAGTCGAACTGAAGGTCTCCAGCAAAACGGrGrGrG | TS oligo, 6-base barcode 23 |
| rampage_TS_24 | TAGTCGAACTGAAGGTCTCCAGCACCTACGrGrGrG | TS oligo, 6-base barcode 24 |
| rampage_TS_25 | TAGTCGAACTGAAGGTCTCCAGCAACTAGArGrGrG | TS oligo, 6-base barcode 25 |
| rampage_TS_26 | TAGTCGAACTGAAGGTCTCCAGCACCCCTTrGrGrG | TS oligo, 6-base barcode 26 |
| rampage_TS_27 | TAGTCGAACTGAAGGTCTCCAGCAGGTATArGrGrG | TS oligo, 6-base barcode 27 |
| rampage_TS_28 | TAGTCGAACTGAAGGTCTCCAGCAGATCCCrGrGrG | TS oligo, 6-base barcode 28 |
| rampage_TS_29 | TAGTCGAACTGAAGGTCTCCAGCACAAATGrGrGrG | TS oligo, 6-base barcode 29 |
| rampage_TS_30 | TAGTCGAACTGAAGGTCTCCAGCAGCGTTGrGrGrG | TS oligo, 6-base barcode 30 |
| rampage_TS_31 | TAGTCGAACTGAAGGTCTCCAGCAAACTGARGrGrG | TS oligo, 6-base barcode 31 |
| rampage_TS_32 | TAGTCGAACTGAAGGTCTCCAGCACCAATArGrGrG | TS oligo, 6-base barcode 32 |
| rampage_TS_33 | TAGTCGAACTGAAGGTCTCCAGCAGCGACTrGrGrG | TS oligo, 6-base barcode 33 |
| rampage_TS_34 | TAGTCGAACTGAAGGTCTCCAGCAGGGGATrGrGrG | TS oligo, 6-base barcode 34 |
| rampage_TS_35 | TAGTCGAACTGAAGGTCTCCAGCATCTTCCrGrGrG | TS oligo, 6-base barcode 35 |
| rampage_TS_36 | TAGTCGAACTGAAGGTCTCCAGCAGAACATrGrGrG | TS oligo, 6-base barcode 36 |
| rampage_TS_37 | TAGTCGAACTGAAGGTCTCCAGCATCGAAGrGrGrG | TS oligo, 6-base barcode 37 |
| rampage_TS_38 | TAGTCGAACTGAAGGTCTCCAGCATGCTGCrGrGrG | TS oligo, 6-base barcode 38 |
| rampage_TS_39 | TAGTCGAACTGAAGGTCTCCAGCACTGCTArGrGrG | TS oligo, 6-base barcode 39 |
| rampage_TS_40 | TAGTCGAACTGAAGGTCTCCAGCAGCTGrGrGrG   | TS oligo, 6-base barcode 40 |
